# Supplementary material for: The allometric propagation of COVID-19 is explained by human travel
Source: bioRxiv or medRxiv preprint supplement (doi:10.1101/2021.04.08.21255169), 2021-04-23
Supplement: Supplementary file [file media-6.pdf]

## Supplementary Materials

# The allometric propagation of COVID-19 is explained by human travel

<sup>1</sup>Rohisha Tuladhar, <sup>2</sup>Paolo Grigolini, and <sup>3</sup>Fidel Santamaria

<sup>1, 3</sup> Department of Biology, University of Texas at San Antonio, San Antonio, TX 78249

<sup>2</sup> Department of Physics, University of North Texas, Denton, TX 76203

Corresponding author: [Fidel.santamaria@utsa.edu](mailto:Fidel.santamaria@utsa.edu)

The Excel spreadsheet files contain tables with the results of the curve fits. The columns for **alpha** refer to the power-law exponent. The columns **b**, **beta**, and **gamma**, correspond to the allometric fits. The **tau** column is derived from the exponential fit. The **BestFit** column indicates which fit was best. The **AllRpos** is an ordinate that refers to the original data structure in the Matlab files. The **Date** column is the date when analysis started. The **AirPass** column is the number (in 1000s) of air passengers in 2017.

- Wolrdanalysis.xlsx

We extracted data for subregions in several countries. The tables have the same structure as the World Table without the air passengers. Files:

- Australiaanalysis.xlsx
- Canadaanalysis.xlsx
- Chinaanalysis.xlsx

The US table has the same structure as the World table plus columns for the average number of **urban**, **suburban**, and **rural** miles traveled by state. Files

- USanalysis.xlsx

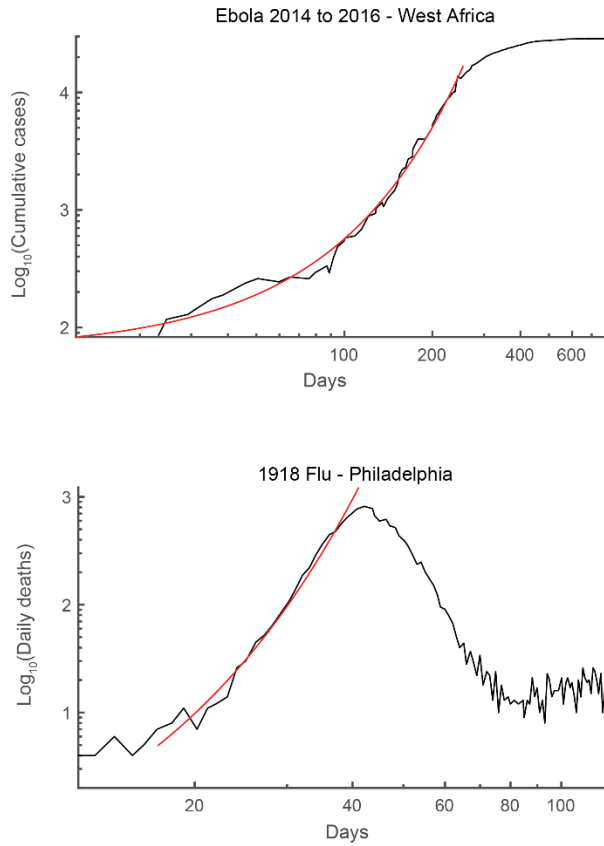

Figure S1. (Top) Total positive cases during the Ebola epidemic in West Africa during 03/01/2014-05/01/2016. The red curve shows the exponential fit ( $e^{0.0218t}$ ). (Bottom) Weekly influenza deaths during the 1918 pandemic in Philadelphia during 09/01/1918-01/01/1919. The red curve shows the exponential fit ( $e^{0.228t}$ ).

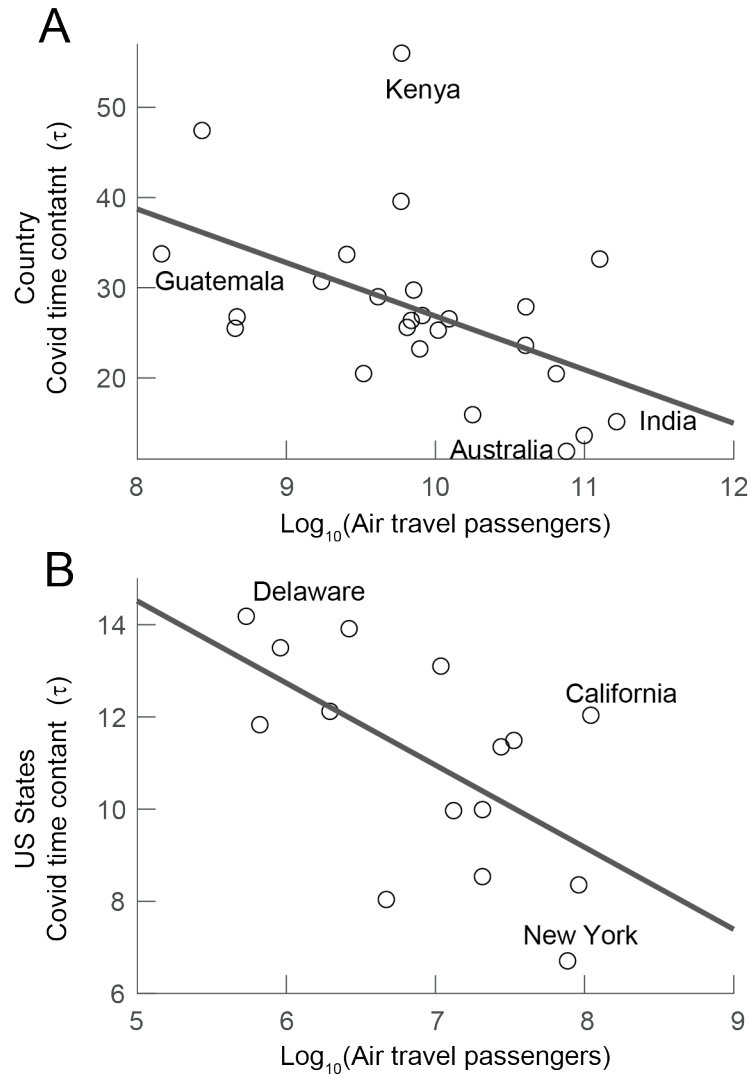

Figure S2. The time constant of the spread of the cumulative cases of COVID-19 correlate with the scale of air travel. A) The time constants obtained from fitting an exponential function to the data for the World. Only those countries that shows a better fit than the power-law were analyzed. B) The same for the amount of air travel in US states.

Table of correlations and p-values for the magnitude of air passengers and vehicle travelled miles modalities per US state. Figure 5 in the main text:

|          | Log <sub>10</sub> (Air Passengers) |         |
|----------|------------------------------------|---------|
|          | r                                  | p-value |
| Urban    | 0.34                               | 0.05    |
| Suburban | 0.16                               | 0.37    |
| Rural    | 0.10                               | 0.57    |
